# Supplementary material for: Developing cadmium-free window layers for solar cell applications: some factors controlling the growth and morphology of β-indium sulfide thin films and related (In,Zn)S ternaries
Source: Royal Society of Chemistry journal article supplement (doi:10.1039/b305789e), 2003-01-01
Supplement: b305789e.pdf [file b305789e.pdf]

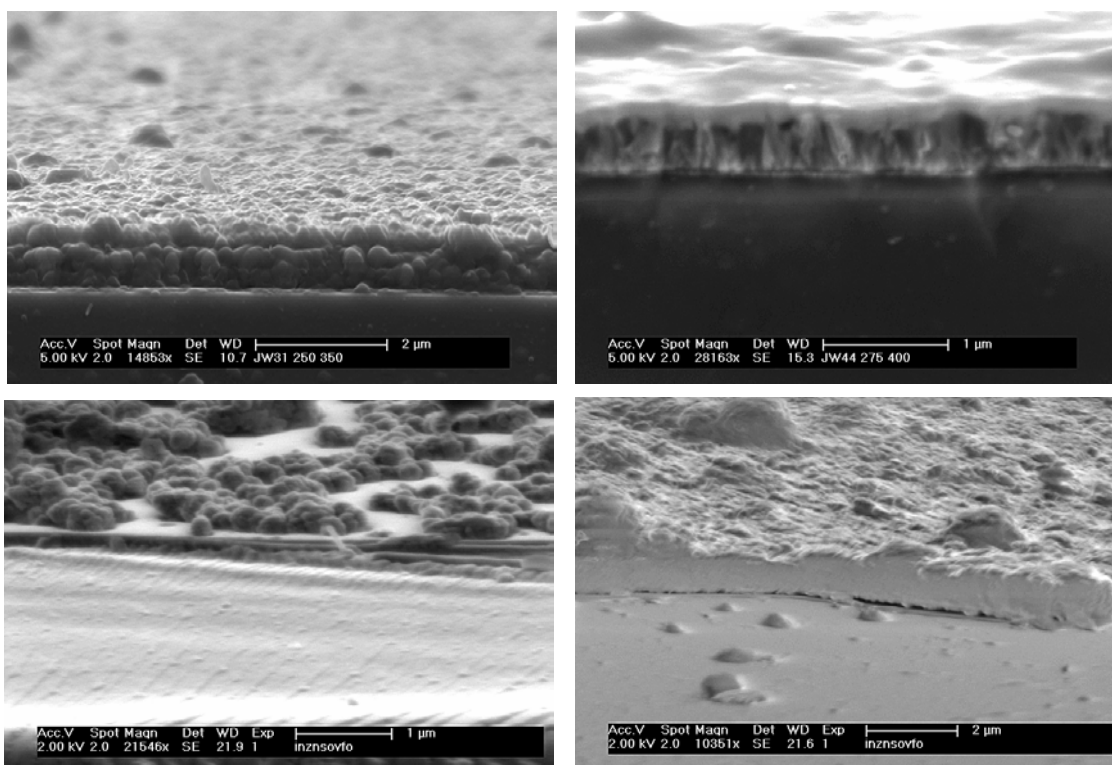

Representative SEM cross sections of thin films of  $\text{In}_2\text{S}_3$  ( $\sim 150$  nm) deposited from baths containing  $\text{InCl}_3$  ( $0.0083$  mol  $\text{dm}^{-3}$ ), formic acid ( $0.1$  mol  $\text{dm}^{-3}$ ) and thioacetamide ( $0.1$  mol  $\text{dm}^{-3}$ ) on tin oxide coated (TO)-glass (top left and right) and (In,Zn)S thin films grown from modified baths containing zinc formate ( $0.83$  mmol  $\text{dm}^{-3}$ ) on glass (bottom left,  $70^\circ\text{C}$  for 1 h and right,  $50^\circ\text{C}$  for 18 h). For the former, it is difficult to accurately determine the film thickness values for specular films grown at optimum pH 2 (upper left) in contrast to matt films grown outwith the optimum pH (upper right), however QCM measurements confirm data.
